# Supplementary material for: Glucocorticoid receptor inhibits Müller glial galectin‐1 expression via DUSP1‐dependent and ‐independent deactivation of AP‐1 signalling
Source: PubMed Central journal article supplement (PMC6787449; doi:10.1111/jcmm.14559), 2019-07-21
Supplement: JCMM-23-6785-s002.pdf [file JCMM-23-6785-s002.pdf]

**Supplementary Table S1. Primer sequences used in quantitative ChIP-qPCR and real-time qPCR**

**Quantitative ChIP-qPCR**

| <b>Target gene</b>                                     | <b>Sequence</b>                                                                             |
|--------------------------------------------------------|---------------------------------------------------------------------------------------------|
| AP-1-binding site in the <i>LGALS1</i> enhancer region | forward 5'- CCA AGC CCA CAT CTC CTC -3'<br>reverse 5'- GAG GCT GCA GCT GGT TTA GT -3'       |
| GR-binding site in the <i>DUSP1</i> promoter region    | forward 5'- GCG CAG GCG AAA ACA CAC AA -3'<br>reverse 5'- CGA CGC GCT AGG TAC ACA AAC A -3' |

**Real-time qPCR**

| <b>Target gene</b> | <b>Sequence</b>                                                                                                                               |
|--------------------|-----------------------------------------------------------------------------------------------------------------------------------------------|
| Human              |                                                                                                                                               |
| <i>LGALS1</i>      | forward 5'- CGC TAA GAG CTT CGT GCT GAA C -3'<br>reverse 5'- CAC ACC TCT GCA ACA CTT CCA G -3'                                                |
| <i>DUSP1</i>       | forward 5'- CTG CCT TGA TCA ACG TC TCA -3'<br>reverse 5'- CTG TGC CTT GTG GTT GTC CT -3'                                                      |
| <i>ANXA1</i>       | forward 5'- GCG AAA CAA TGC ACA GCG TCA AC -3'<br>reverse 5'- CAA CCT CCT CAA GGT GAC CTG T -3'                                               |
| <i>TSC22D3</i>     | forward 5'- ATC TGC AAC CGC AAC ATC GAC C -3'<br>reverse 5'- GCA TAC ATC AGA TGA TTC TTC ACC -3'                                              |
| <i>ACTB</i>        | forward 5'- CTG GAA CGG TGA AGG TGA CA -3'<br>reverse 5'- AAG GGA CTT CCT GTA ACA ATG CA -3'                                                  |
| Mouse              |                                                                                                                                               |
| <i>Lgals1</i>      | forward 5'- GTC TCA GGA ATC TCT TCG CTT C -3'<br>reverse 5'- TCC CCG AAC TTT GAG ACA TTC -3'<br>probe 5'- TTC AAT CAT GGC CTG TGG TCT GGT- 3' |
| <i>Dusp1</i>       | forward 5'- GGC CAG CTG CTG CAG TTT GAG T -3'<br>reverse 5'- AGG TGC CCC GGT CAA GGA CA -3'                                                   |
| <i>Actb</i>        | forward 5'- CAT CCG TAA AGA CCT CTA TGC CAA C -3'<br>reverse 5'- ATG GAG CCA CCG ATC CAC A -3'                                                |
